# Supplementary material
Source: MDPI journal article supplement (https://www.mdpi.com/2073-4395/9/2/49)

**Figure S2.** Distribution of the ability to suppress CMS phenotype across sunflower samples with different allelic states for 8 statistically significant markers: A)S13\_170494693, B)S13\_171053833, C)S13\_173268042, D)S13\_173832391, E)S13\_174474103, F)S13\_174474122, G)S13\_174809087, H)S13\_178217103

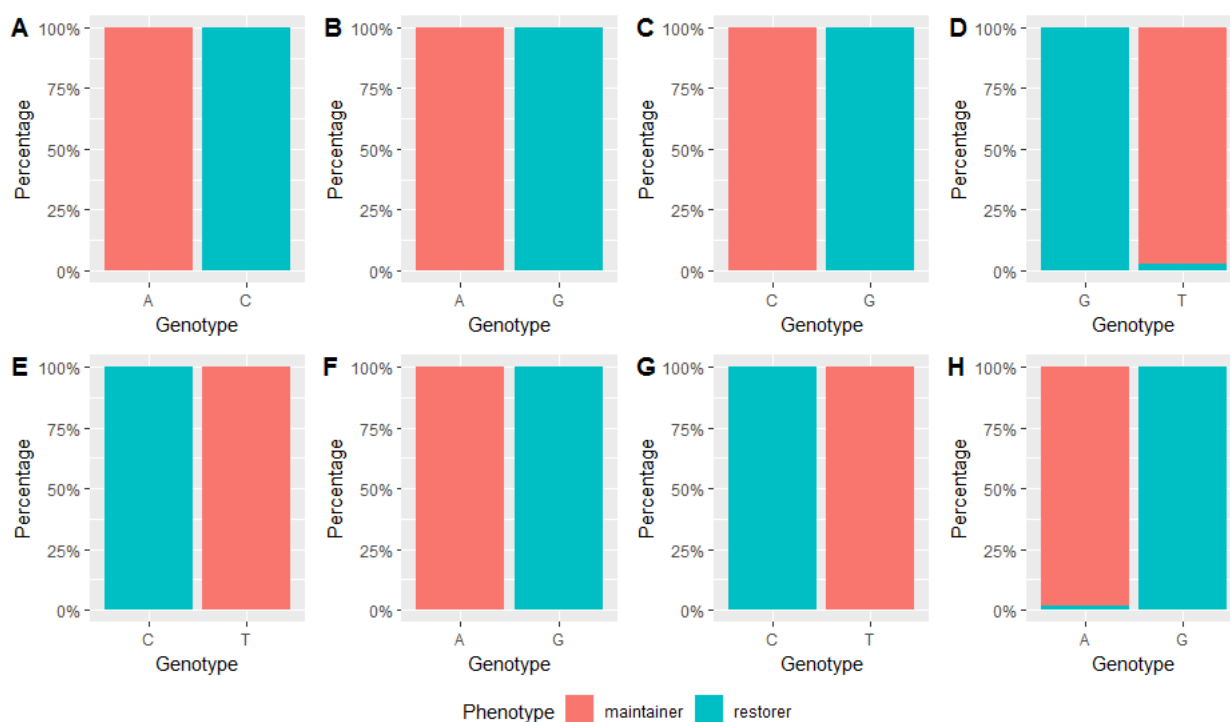

Supplement: s1 [file s1]
