# Supplementary material
Source: MDPI journal article supplement (https://www.mdpi.com/2073-4395/9/2/49)

**Figure S1.** Quantile-quantile plot of associations with the ability to suppress CMS phenotype

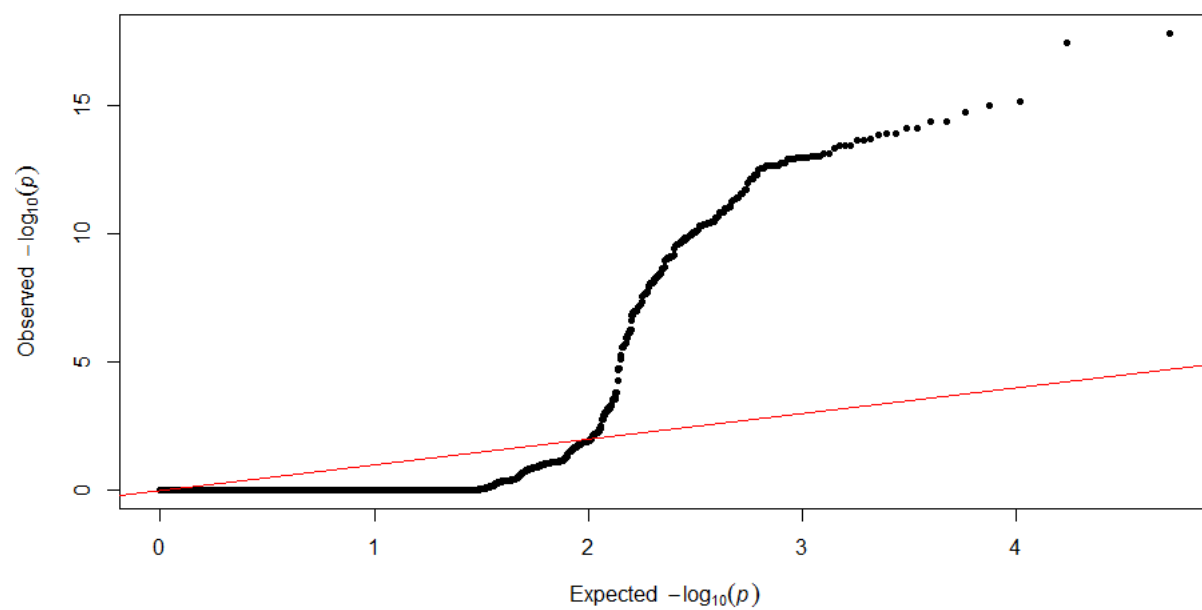

Supplement: s1 [file s1]
